# Supplementary material
Source: publisher figshare collection journal article supplement (https://frontiersin.figshare.com/ndownloader/files/17891078)
Supplement: Supplementary file [file 17891078]

**Supplementary Figure S1.** MIC distributions for benzothiazole amides and control antibiotics against a collection of n=54 rapid-growing NTM clinical isolates, including n=20 *M. abscessus*, n=11 *M. chelonae*, n=11 *M. fortuitum*, and n=12 other rapid-growing NTM. The benzothiazole amides demonstrated a tight MIC range (green), while a bimodal MIC distribution due to non-susceptible strains was observed for amikacin, linezolid and azithromycin.

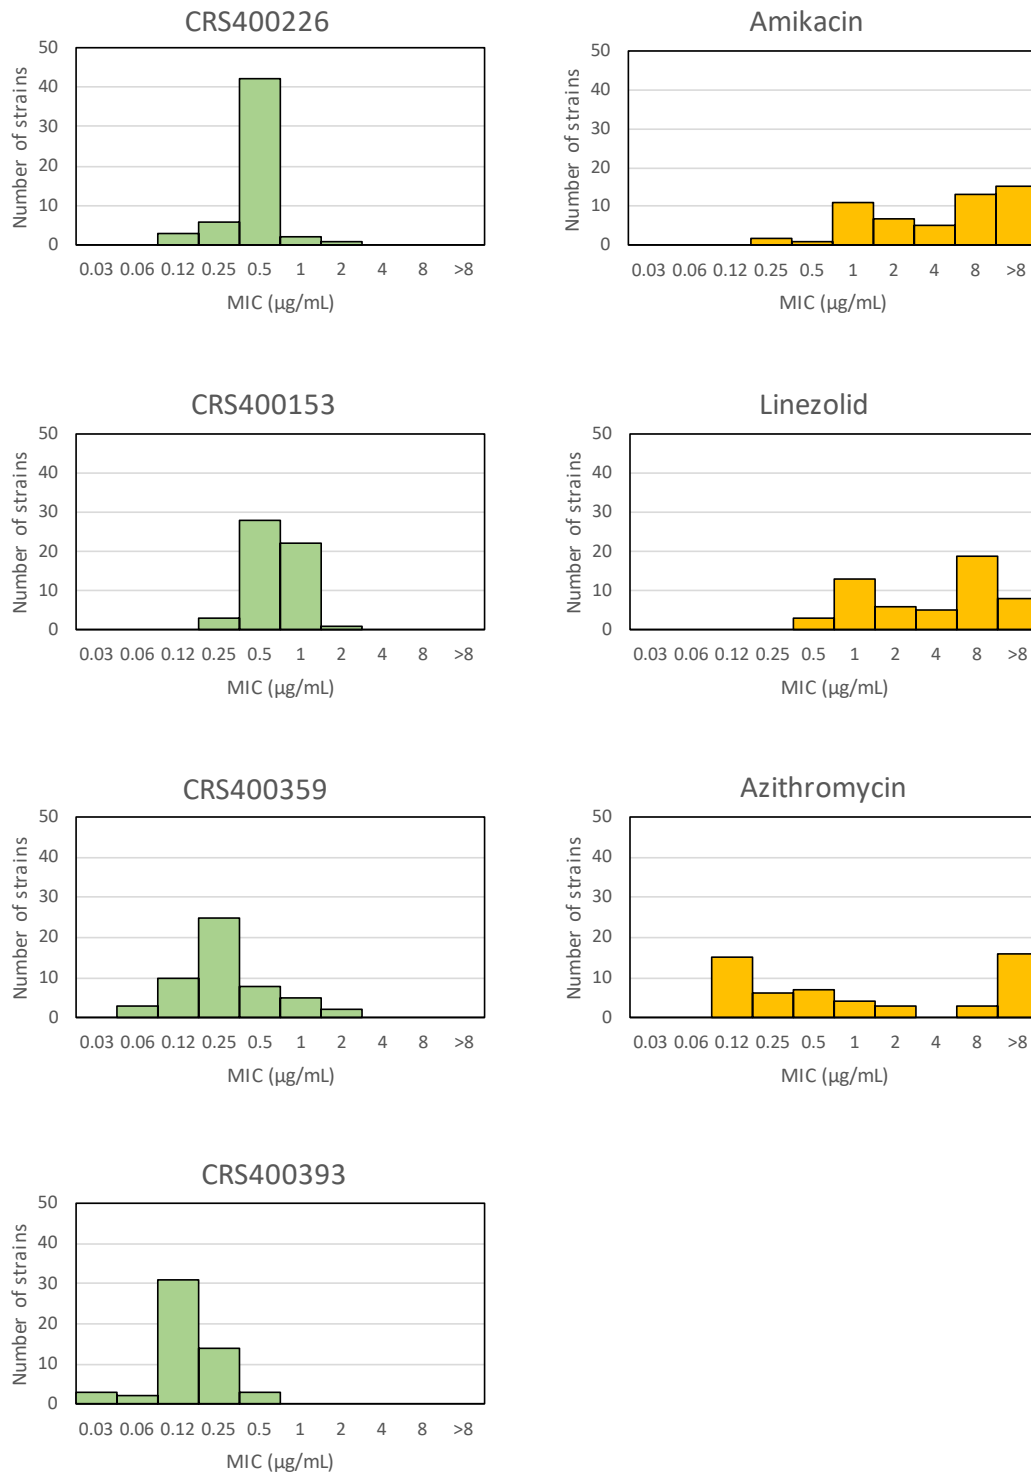

**Supplementary Table S2.** *In vitro* activity of CRS400226 under different testing conditions and against drug-resistant strains of *Mtb*. IC<sub>90</sub> values, defined as drug concentrations that inhibited 90% of growth compared to no-drug controls were determined from a dose-response growth inhibition assay in the presence of increasing drug concentrations.

| Condition/strain                        | IC <sub>90</sub> (µg/mL) | MBC (µg/mL) |
|-----------------------------------------|--------------------------|-------------|
| Aerobic                                 | 4.0                      | 10.6        |
| Low oxygen (Wayne hypoxic model)        | 6.8                      | NT          |
| Intracellular <i>Mtb</i>                | 0.8                      | NT          |
| Fluoroquinolone-resistant <i>Mtb</i>    | 3.7                      | NT          |
| Isoniazid-resistant <i>Mtb</i> strain 1 | 3.9                      | NT          |
| Isoniazid-resistant <i>Mtb</i> strain 2 | 4.2                      | NT          |
| Rifampin-resistant <i>Mtb</i> strain 1  | 3.9                      | NT          |
| Rifampin-resistant <i>Mtb</i> strain 2  | 4.7                      | NT          |

**Supplementary Table S3.** *In vitro* ‘checkerboard’ synergy testing of CRS400393 with other antibiotics.

| Antibiotic       | FIC Index | Interpretation |
|------------------|-----------|----------------|
| Amikacin         | 1         | additive       |
| Ciprofloxacin    | 0.56      | additive       |
| Azithromycin     | 1         | additive       |
| Doxycycline      | 2         | indifferent    |
| Sulfamethoxazole | 0.56      | additive       |
| Tobramycin       | 0.75      | additive       |
| Bedaquiline      | 2         | indifferent    |
| Clofazimine      | 0.52      | additive       |
| Linezolid        | 0.56      | additive       |
| Cefoxitin        | 0.56      | additive       |

**Supplementary Figure S4.** Metabolic labeling with [ $^{14}\text{C}$ ]acetate of *Mabs* ATCC19977 cultures either untreated or treated with benzothiazole amides at 2x and 10x MIC. A. Total lipids; TMM, trehalose mono-mycolate; TDM, trehalose di-mycolate. B. Cell wall-bound  $\alpha$  and  $\alpha'$  mycolates.

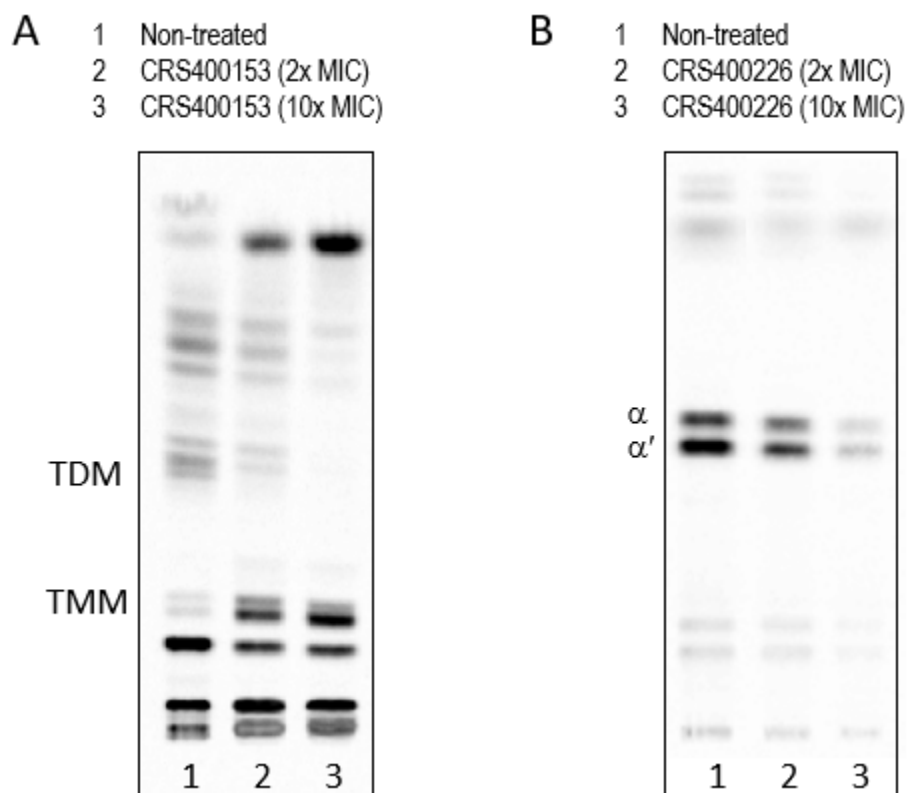

**Supplementary Figure S5.** Histopathology of lungs (middle right lobes) of GM-CSF knockout mice infected with *M. abscessus* by the intrapulmonary route and treated for 4 weeks (5 days/week) with the respective agents. Azithromycin was administered by oral gavage. CRS400226 and vehicle were delivered via intrapulmonary microspray administration. At the time of necropsy, the right middle lung lobes from 5 animals per group were placed in 4% paraformaldehyde, followed by paraffin embedding and hematoxylin and eosin staining. Image was taken at 4x.

Untreated

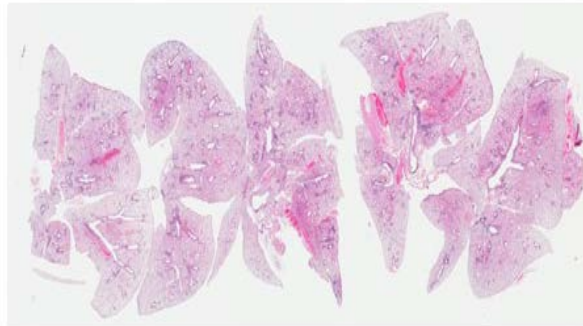

Azithromycin

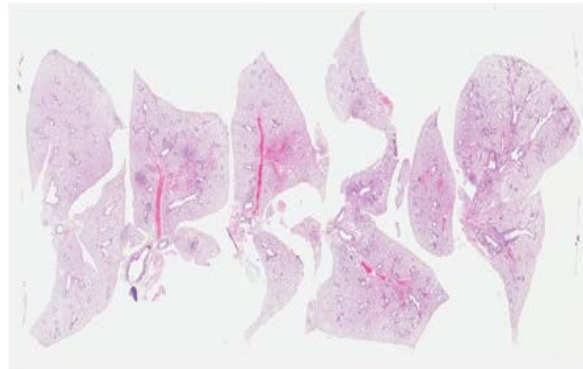

Vehicle

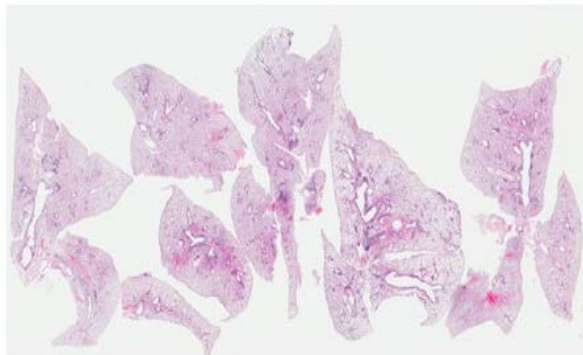

CRS400226

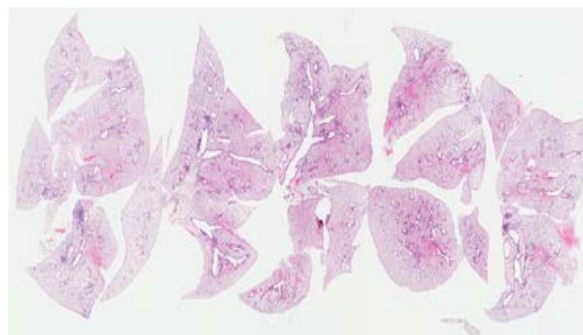

**Supplementary Table S6.** MIC values for benzothiazole amides and control agents against *M. abscessus*. MIC shifts of the highly protein-bound benzothiazole amides were observed in Middlebrook medium (7H9+OADC) compared to Muller Hinton broth (MHB) due to the presence of 5 mg/mL albumin in the OADC supplement.

| Compound      | <i>M. abscessus</i> 1 |            | <i>M. abscessus</i> 21 |            | <i>M. abscessus</i> 79 |            |
|---------------|-----------------------|------------|------------------------|------------|------------------------|------------|
|               | MHB                   | 7H9 + OADC | MHB                    | 7H9 + OADC | MHB                    | 7H9 + OADC |
| CRS400226     | 0.25                  | 8          | 0.25                   | 8          | 0.25                   | 2          |
| CRS400359     | 0.06                  | 1          | 0.06                   | 2          | 0.06                   | 0.25       |
| CRS400393     | 0.06                  | 1          | 0.03                   | 1          | 0.03                   | 0.5        |
| Amikacin      | 8                     | 16         | 2                      | 4          | 2                      | 4          |
| Ciprofloxacin | 4                     | 8          | 4                      | 4          | NT                     | 2          |
